# Supplementary material for: Corrigendum: MiR-29a Knockout Aggravates Neurological Damage by Pre-polarizing M1 Microglia in Experimental Rat Models of Acute Stroke
Source: Frontiers journal article supplement (doi:10.3389/fgene.2021.738582), 2021-10-26
Supplement: Data_Sheet_1.ZIP [file Data_Sheet_1.ZIP]

1#-1 del284bp,add1bp ()

CcagaacctgctcaagtagcagcgggcctgccctcgcccgccctgcttacctcggtgttgtggatagctaattagtcatccgttgtcagaatttcatacttgttcacatagtaagcctactctggaagcagactccatcaagcctggatgaagaccctacatgtacaacagacagaaggcccgggccttcccaatgcacatgacctcttgtgaccccttagaggatgactgatttcttttggtgttcagagtcaatagaattttctagcaccatctgaaatcggttataatgattggggaaaagcaccatgcagctgactcgagactaatctattgttgactttggagccacaggtaagaattaaggaaaaaaatactaagacatactaaggcacattttccctcttcgtatttttaactattcacGatagtgatggtaaatagtgttttataaagtgtgtggggattgaaggtttgatgagaactagaggataaaggggc

Primers were used for miR-29a knockout rat genotyping:

Rat miR29a-check-S: AGGGAAGAATGCAGCAAGTGACT;

Rat miR29a-check-AS: ATGTTTCCTGCTCCTCTCACATTG
