# Supplementary material for: Corrigendum: MiR-29a Knockout Aggravates Neurological Damage by Pre-polarizing M1 Microglia in Experimental Rat Models of Acute Stroke
Source: Frontiers journal article supplement (doi:10.3389/fgene.2021.738582), 2021-10-26
Supplement: Table_1.XLSX [file Table_1.XLSX]

## Sheet: Sheet1
	精氨酸	丝氨酸	谷氨酰胺	天冬氨酸	瓜氨酸	苏氨酸	丙氨酸	谷氨酸	组氨酸	精氨酸	脯氨酸	鸟氨酸	赖氨酸	甲硫氨酸	解氨酸	络氨酸	异亮氨酸	亮氨酸	苯丙氨酸	色氨酸
WT TYPE	Asn	Ser	Gln	Asp	Cit	Thr	Ala	Glu	His	Arg	Pro	Orn	Lys	Met	Val	Tyr	Ile	Leu	Phe	Trp
19P07740001	0.10531	0.578885	1.81761	1.56818	0.00244849	0.49214	0.901444	2.0286	0.0542391	0.159996	0.174149	0.00665098	0.175152	0.0505838	0.0990801	0.0571914	0.062313	0.144462	0.0807952	0.0149537
19P07740002	0.0534989	0.32931	0.989567	0.844241	0.00129602	0.343484	0.630908	1.11134	0.0222574	0.105239	0.0928109	0.000565085	0.125786	0.0226067	0.0364375	0.0266889	0.0256153	0.0646415	0.0355112	0.0079366
19P07740003	0.155976	0.464142	2.3985	1.72326	0.00190449	0.672242	0.69774	1.83564	0.0485178	0.136267	0.14196	/	0.153824	0.0568271	0.0848108	0.0597204	0.0565944	0.127378	0.0774845	0.0123813
19P07740004	0.064	0.193	2.001	0.769	0.002	0.685	0.823	1.711	0.061	0.158	0.165	/	0.142	0.058	0.046	0.034	0.068	0.087	0.081	0.009
19P07740005	0.122	0.673	1.401	1.468	0.003	0.523	0.502	1.356	0.036	0.098	0.141	/	0.196	0.031	0.089	0.059	0.051	0.099	0.056	0.005
19P07740006	0.131	0.496	1.804	1.899	0.001	0.302	0.903	1.912	0.031	0.146	0.102	/	0.121	0.041	0.08	0.049	0.027	0.149	0.062	0.023
	0.105297	0.455723	1.73528	1.37861	0.0019415	0.502978	0.743015	1.6591	0.042169	0.133917	0.136153	0.00360803	0.152294	0.0433363	0.0725547	0.0476001	0.0484204	0.111914	0.0654651	0.0120453
TRANSGENIC	Asn	Ser	Gln	Asp	Cit	Thr	Ala	Glu	His	Arg	Pro	Orn	Lys	Met	Val	Tyr	Ile	Leu	Phe	Trp
19P07740007	0.22643	0.778972	3.98503	2.81427	0.00284232	0.892572	0.996164	3.72984	0.0862965	0.381284	0.221121	/	0.295181	0.112197	0.186896	0.106361	0.108836	0.305772	0.169659	0.0339629
19P07740008	0.0495379	0.343406	1.01686	0.776788	0.00133276	0.263095	0.384605	1.11421	0.0249771	0.100224	0.0568776	/	0.135367	0.0263351	0.0357816	0.0316291	0.0251444	0.0624746	0.0346161	0.00651637
19P07740009	0.0594523	0.185819	0.917234	0.996287	0.000706251	0.155996	0.233509	0.853696	0.0187693	0.0991293	0.0489838	/	0.0509509	0.0265453	0.0166379	0.0245669	0.0186021	0.0550368	0.0380168	0.00674404
19P07740010	0.114	0.531	1.776	1.597	0.003	0.442	0.741	1.928	0.035	0.259	0.148	/	0.149	0.051	0.077	0.063	0.043	0.179	0.078	0.021
19P07740011	0.099	0.364	3.021	1.684	0.001	0.657	0.571	1.257	0.054	0.175	0.093	/	0.201	0.073	0.096	0.069	0.081	0.112	0.063	0.011
19P07740012	0.122	0.413	1.122	1.306	0.002	0.212	0.302	2.45	0.041	0.148	0.085	/	0.131	0.042	0.068	0.032	0.032	0.131	0.105	0.018
	0.111737	0.436033	1.97302	1.52906	0.00181355	0.437111	0.538046	1.88879	0.0433405	0.193773	0.10883	#DIV/0!	0.160416	0.0551796	0.0800526	0.0544262	0.0514304	0.140881	0.081382	0.0162039
